# Supplementary material for: New Evidence on a Distinction between Aβ40 and Aβ42 Amyloids: Thioflavin T Binding Modes, Clustering Tendency, Degradation Resistance, and Cross-Seeding
Source: MDPI journal article supplement (doi:10.3390/ijms23105513), 2022-05-15
Supplement: s1 [file s1]

## Supporting Information

### **New Evidence on a Distinction between A $\beta$ 40 and A $\beta$ 42 Amyloids: Thioflavin T Binding Modes, Clustering Tendency, Degradation Resistance, and Cross-Seeding**

**Anna I. Sulatskaya<sup>1</sup>, Georgy N. Rychkov<sup>2,3</sup>, Maksim I. Sulatsky<sup>4</sup>, Ekaterina V. Mikhailova<sup>1</sup>, Nadezhda M. Melnikova<sup>1</sup>, Veronika S. Andozhskaya<sup>1</sup>, Irina M. Kuznetsova<sup>1</sup>, Konstantin K. Turoverov<sup>1,\*</sup>**

<sup>1</sup> Laboratory of structural dynamics, stability and folding of proteins, Institute of Cytology, Russian Academy of Sciences, 4 Tikhoretsky ave., 194064 St. Petersburg, Russia; ansul@mail.ru (A.I.S.); 4evamkh@gmail.com (E.V.M.); melnikova07nm@gmail.com (N.M.M.); veronika.andozhskaya@gmail.com (V.S.A.); imk@incras.ru (I.M.K.); kkt@incras.ru (KKT)

<sup>2</sup> Laboratory of Molecular and Cellular Biophysics, Petersburg Nuclear Physics Institute Named by B.P. Konstantinov of National Research Center «Kurchatov Institute», mkr. Orlova roshcha 1, 188300 Gatchina, Russia; georgy-rychkov@yandex.ru (G.N.R.)

<sup>3</sup> Institute of Biomedical Systems and Biotechnology, Peter the Great St. Petersburg Polytechnic University, Polytechnicheskaya 29, 195251 St. Petersburg, Russia;

<sup>4</sup> Laboratory of cell morphology, Institute of Cytology, Russian Academy of Sciences, 4 Tikhoretsky ave., 194064 St. Petersburg, Russia; m\_sulatsky@mail.ru (M.I.S.)

\* Correspondence: ansul@mail.ru (A.I.S.); imk@incras.ru (I.M.K.); kkt@incras.ru (K.K.T.); Tel.: +7-812-297-19-57

## Table of Contents

|                                                                                                                                                                                           |     |
|-------------------------------------------------------------------------------------------------------------------------------------------------------------------------------------------|-----|
| Amino acid sequence of Abeta-peptides (Scheme S1).....                                                                                                                                    | S-3 |
| Distribution of the dihedral angle between the aminobenzene and benzthiazole rings of ThT located in the binding sites of A $\beta$ 40 (A) and A $\beta$ 42 (B) fibrils (Figure S1) ..... | S-4 |
| Fluorescence intensity of thioflavin T (ThT) probe in the presence of GdnHCl (Figure S2).....                                                                                             | S-5 |

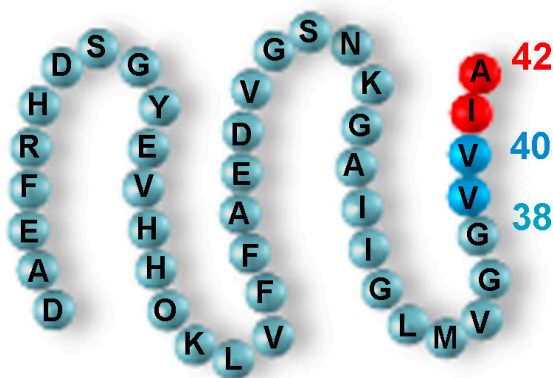

**Scheme S1.** Amino acid sequence of Abeta-peptides.

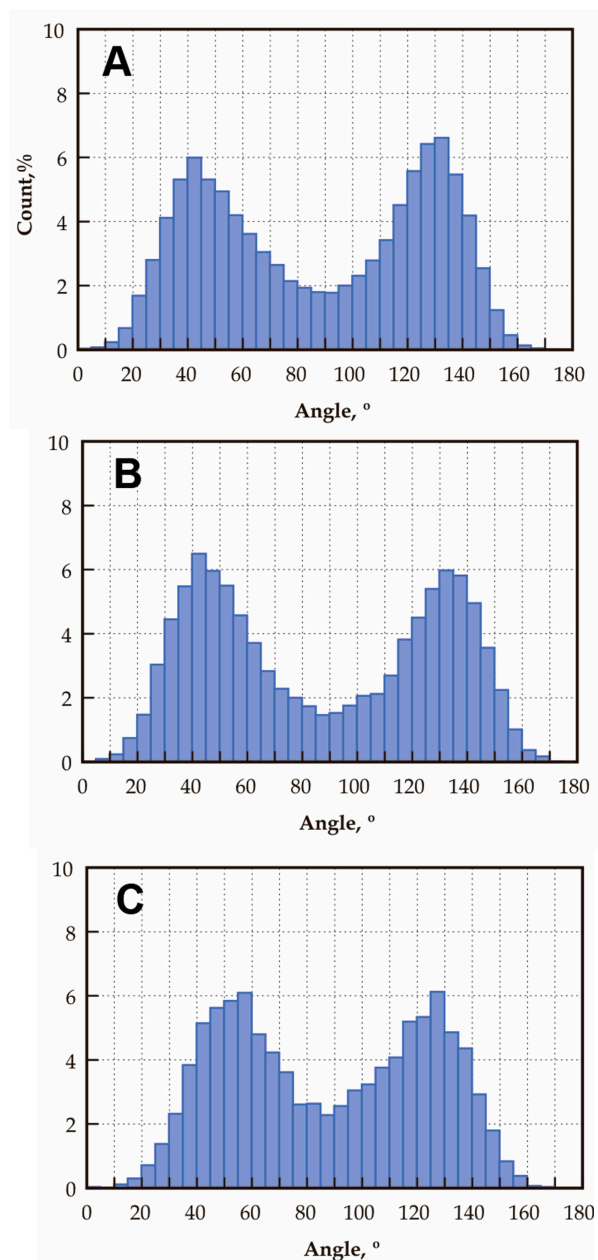

**Figure S1.** Distribution of the dihedral angle between the aminobenzene and benzthiazole rings of ThT located in the binding sites of A $\beta$ 40 (**A**) and A $\beta$ 42 (**B**) fibrils, characterized by the lowest free binding energy, as well as ThT in the free state in an aqueous environment (**C**).

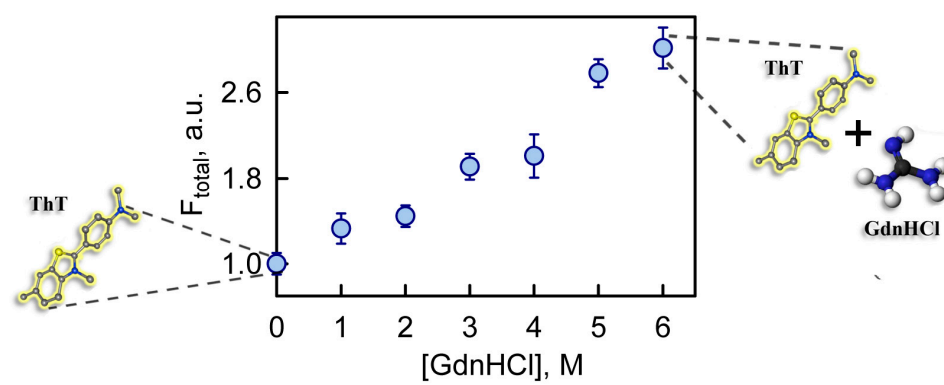

**Figure S2.** Fluorescence intensity of thioflavin T (ThT) probe in the presence of GdnHCl. Total ThT fluorescence intensity normalized to fluorescence of free dye in water solution is presented.
